# Supplementary material for: Distribution and ecological risk assessment of typical antibiotics in the surface waters of seven major rivers, China
Source: Royal Society of Chemistry journal article supplement (doi:10.1039/d1em00079a), 2021-01-01
Supplement: d1em00079a1.pdf [file d1em00079a1.pdf]

**Distribution and ecological risk assessment of typical antibiotics in  
surface waters of seven major rivers, China**

Zhizhen Yin

The Key Laboratory of pollutant Chemistry and Environmental Treatment, School  
of Chemistry and environment Sciences, Yili Normal University, Yining 835000,  
China. E-mail: yinzhizhen123@163.com

## **Contents of supporting information**

**Table S1** Summary of the extraction and separation methods for antibiotics in surface waters of seven major rivers in china reported in the literature between 2010 and 2020

**Table S2** Summary of the aquatic toxicity data and minimum PNEC values of target antibiotics

**Table S3** Sampling sites of studies on target antibiotics in surface waters of seven major rivers in China

**Table S1** Summary of the extraction and separation methods for antibiotics in surface waters of seven major rivers in china reported in the literature between 2010 and 2020

| Pretreatment method                                                                                                                                                                 | Extraction                                                                                                                                                                   | Separation                                                                                                                                                                                   | Detection                                                                             | Reference |
|-------------------------------------------------------------------------------------------------------------------------------------------------------------------------------------|------------------------------------------------------------------------------------------------------------------------------------------------------------------------------|----------------------------------------------------------------------------------------------------------------------------------------------------------------------------------------------|---------------------------------------------------------------------------------------|-----------|
| Water samples (1 L) were filtered through 0.22 $\mu\text{m}$ micropore membranes.                                                                                                   | NA                                                                                                                                                                           | BEH C18 column (50 mm $\times$ 2.1 mm, 1.7 $\mu\text{m}$ )<br>The mobile phase contained 0.01% formic acid in pure water (A) and 100% acetonitrile (B).                                      | LOD: 0.071~0.432 ng/L;<br>LOQ: 0.21~1.369 ng/L;<br>Recovery: 81.12~115.69%            | 1         |
| Water samples were filtered through 0.45 $\mu\text{m}$ glass fiber filters and then acidified to pH 3 by adding HCl. 0.2 g/L $\text{Na}_2\text{EDTA}$ was added into water samples. | Oasis HLB cartridges (500 mg, 6mL)<br>Pretreatment: methanol (6 mL) and ultrapure water (6mL). Rinse: 6 mL ultrapure water. Elution: 6mL ultrapure water and 12 mL methanol. | BEH C18 column (100 mm $\times$ 2.1 mm, 1.7 $\mu\text{m}$ )                                                                                                                                  | LOQ: 0.05~5 ng/L;<br>Recovery: 84.5~107.3%;<br>RSD: <5%                               | 2         |
| Water samples were adjusted to pH 3 using $\text{H}_2\text{SO}_4$ , added with 5% methanol.                                                                                         | Oasis HLB cartridges (200mg, 6 m)<br>Pretreatment: methanol (10 mL) and Milli-Q water (10mL). Rinse: 10 mL Milli-Q water. Elution: 12 mL methanol.                           | BEH C18 column (100 mm $\times$ 2.1 mm, 1.7 $\mu\text{m}$ ) .<br>The mobile phase contained 0.1% formic acid in Milli-Q water (A) and acetonitrile (B).                                      | LOD: 0.02~5.03 ng/L;<br>Recovery: 40~140%                                             | 3         |
| Water samples were filtered through 0.7 $\mu\text{m}$ glass fiber filters and acidified to pH 4 with formic acid, followed by the addition of 0.2 g/L $\text{Na}_2\text{EDTA}$ .    | Elution: 10 mL methanol.                                                                                                                                                     | HSS T3 column (100 mm $\times$ 2.1 mm, 1.8 $\mu\text{m}$ )<br>The mobile phase contained 0.1% formic acid in ultrapure water (A) and acetonitrile with 0.1% formic acid (B).                 | LOD: 0.01~1.07 ng/L;<br>LOQ: 0.03~1.71 ng/;<br>Recovery: 63.0~126.8% ;<br>RSD: < 5.5% | 4         |
| Water samples were filtered by glass fiber filter, and then pH was adjusted to 5.                                                                                                   | Strata-X cartridges (200 mg, 6 mL)<br>Pretreatment: deionized water (6 mL) and methanol (6 mL).<br>Rinse: 6 mL deionized water. Elution: 3 mL methanol.                      | Supelco Discovery HS C18 column (150 mm $\times$ 4.6 mm, 3 $\mu\text{m}$ )<br>The mobile phase contained 0.1% formic acid in ultrapure water (A) and acetonitrile (B)                        | LOQ: 0.15~9.1 ng/L;<br>Recovery: 77~159%                                              | 5         |
| Water samples were acidified to pH 4.0 with citrate buffer, followed by the addition of 0.2 g/L $\text{Na}_2\text{EDTA}$ .                                                          | Oasis HLB cartridges (200 mg, 6 mL)<br>Pretreatment: methanol (6mL) and ultrapure water (10mL).<br>Elution: 10 mL methanol.                                                  | HSS T3 column (100 mm $\times$ 2.1 mm, 1.8 $\mu\text{m}$ )<br>Ultrapure water containing 0.1% formic acid (A) and acetonitrile containing 0.1% formic acid (B) was used as the mobile phase. | LOD: 0.01~1.18 ng/L;<br>LOQ: 0.03~1.68 ng/L;<br>Recovery: 62.1~129.4%                 | 6         |

|                                                                                                                                                                                                              |                                                                                                                                                                                                                   |                                                                                                                                                                                     |                                                                |    |
|--------------------------------------------------------------------------------------------------------------------------------------------------------------------------------------------------------------|-------------------------------------------------------------------------------------------------------------------------------------------------------------------------------------------------------------------|-------------------------------------------------------------------------------------------------------------------------------------------------------------------------------------|----------------------------------------------------------------|----|
| Water sample was filtered through 0.45 $\mu\text{m}$ fiber filters and acidified to pH 3 with $\text{H}_3\text{PO}_4$ , followed by the addition of 100 g/L $\text{Na}_2\text{EDTA}$ .                       | Oasis HLB cartridges<br>Pretreatment: methanol (6 mL) and ultrapure water (3 mL) and sodium dihydrogen phosphate solution (6 mL). Rinse: 6 mL ultrapure. Elution: 3 mL methanol and 6 mL methanol with 2% ammonia | Poroshell 120 EC-C18 (2.1 mm $\times$ 75 mm, 2.7 $\mu\text{m}$ )<br>The mobile phase contained acetonitrile (A) and 0.2% formic acid in ultrapure water (B).                        | LOD: 0.1~1.6 ng/L;<br>Recovery: 74.3~95.8%;<br>RSD: 4.7~9.5%   | 7  |
| Water sample (1L) was filtered through 0.45 $\mu\text{m}$ fiber filters, and then 5 mL of 100g/L $\text{Na}_2\text{EDTA}$ was added and the pH was adjusted to 4 with 50% $\text{H}_3\text{PO}_4$ .          | Pretreatment: methanol (6 mL) and ultrapure water (3 mL) and sodium dihydrogen phosphate solution (6 mL). Rinse: 6 mL ultrapure water. Elution: 6 mL methanol with 2% ammonia.                                    | ZORBAX Eclipse Plus C18 (150 mm $\times$ 2.1 mm, 3.5 $\mu\text{m}$ )<br>The mobile phase contained 0.2% formic acid in ultrapure water (A) and acetonitrile (B).                    | LOD: 0.03~15 ng/L;<br>Recovery: 41.3~112.6%;<br>RSD: 0.2~12.7% | 8  |
| Water samples were filtered through 0.22 $\mu\text{m}$ fiber filters and then acidified to pH 3 by adding HCl, followed by the addition of 0.5g $\text{Na}_2\text{EDTA}$ .                                   | Poly-Sery HLB cartridges<br>Pretreatment: methanol (10 mL) and ultrapure water (10 mL). Rinse: 5 mL methanol with 5% ammonia and 10 mL ultrapure water. Elution: 10 mL methanol.                                  | C18 (2.1 mm $\times$ 50 mm, 1.8 $\mu\text{m}$ )<br>The mobile phase contained 0.2% formic acid (A) and acetonitrile (B).                                                            | Recovery: 69~125%                                              | 9  |
| Water sample (1L) was filtered through 0.45 $\mu\text{m}$ glass fiber filters and acidified to pH 3.                                                                                                         | Oasis HLB cartridge<br>Rinse: ultrapure water. Elution: methanol.                                                                                                                                                 | NA                                                                                                                                                                                  | LOQ: 1~20 ng/L;<br>Recovery: 61~86%                            | 10 |
| Water samples (1L) were filtered through 0.45 $\mu\text{m}$ glass fiber filters and acidified to pH 3 by adding $\text{H}_2\text{SO}_4$ , followed by the addition of 10 mL of 5% $\text{Na}_2\text{EDTA}$ . | HLB cartridges<br>Pretreatment: methanol (6 mL) and ultrapure water (6 mL).                                                                                                                                       | C18 (4.6 mm $\times$ 150 mm, 3.5 $\mu\text{m}$ )<br>The mobile phase contained 0.1% formic acid in ultrapure water (A) and acetonitrile with 0.1% formic acid (B).                  | LOQ: 0.1~1.4 ng/L;<br>Recovery: 73~92%;<br>RSD: <20%           | 11 |
| Water samples were filtered through 0.7 $\mu\text{m}$ fiber filters and then 0.5g $\text{Na}_2\text{EDTA}$ was added. Samples were acidified to pH 3 by adding 4mol/L HCl.                                   | Oasis HLB (200 mg, 6mL)<br>Pretreatment: methanol (10 mL) and ultrapure water (10 mL). Rinse: 10 mL ultrapure. Elution: 10 mL methanol.                                                                           | Agilent ZORBAX Eclipse Plus C18 (100 mm $\times$ 2.1 mm, 1.8 $\mu\text{m}$ )<br>The mobile phase contained 0.2% formic acid and 2 mmol/L ammonium acetate (A) and acetonitrile (B). | Recovery: 31.4~158.8%;<br>RSD: <20%                            | 12 |

|                                                                                                                                                                                                               |                                                                                                                                                  |                                                                                                                                                                                                  |                                                                 |    |
|---------------------------------------------------------------------------------------------------------------------------------------------------------------------------------------------------------------|--------------------------------------------------------------------------------------------------------------------------------------------------|--------------------------------------------------------------------------------------------------------------------------------------------------------------------------------------------------|-----------------------------------------------------------------|----|
| Water samples (1L) were filtered through 0.7 $\mu\text{m}$ fiber filters and then acidified to pH 3 by adding $\text{H}_2\text{SO}_4$ , followed by the addition of 5% methanol.                              | HLB (1000 mg)<br>Elution: 10 mL methanol.                                                                                                        | Agilent ZORBAX Eclipse Plus C18 (100 mm $\times$ 2.1 mm, 1.8 $\mu\text{m}$ )<br>The mobile phase contained 0.1% formic acid and 5 mmol/L ammonium acetate (A) and acetonitrile (B).              | LOD: 0.4~10 ng/L;<br>Recovery: 61.4~131.5%<br>RSD: <20%         | 13 |
| The pH values of the water samples were adjusted to 3 by adding $\text{H}_2\text{SO}_4$ and then filtered through 0.7 $\mu\text{m}$ fiber filters, followed by the addition of 1 g $\text{Na}_2\text{EDTA}$ . | Oasis HLB (500 mg, 6 mL)<br>Pretreatment: methanol (10 mL) and ultra-pure water (10 mL).<br>Rinse: 10 mL Milli-Q water. Elution: 12 mL methanol. | XDB-C18 column (2.1 mm $\times$ 50 mm, 1.8 $\mu\text{m}$ )<br>The mobile phase contained acetonitrile (A) and 5mM oxalic acid (B).                                                               | LOQ: 0.077~5.3 ng/L;<br>Recovery: 66~158%<br>RSD: 1~10%         | 14 |
| Water samples were filtered through 0.7 $\mu\text{m}$ fiber filters by the addition of 10 mL of 5% $\text{Na}_2\text{EDTA}$ . The pH value was adjusted to 3 using formic acid.                               | HLB (500 mg, 6 mL)<br>Pretreatment: methanol (6 mL) and Milli-Q water (6 mL). Rinse: 10 mL Milli-Q water. Elution: 6 mL methanol.                | Agilent ZORBAX C18 (2.1 mm $\times$ 150 mm, 5 $\mu\text{m}$ )<br>The mobile phase contained acetonitrile (A) and 0.2% formic acid (B).                                                           | LOQ: 0.22~9.96ng/L;<br>Recovery: 55.3~108%<br>RSD: <14%         | 15 |
| Water samples were filtered through 0.7 $\mu\text{m}$ glass fiber filters and then acidified pH to 3 by adding $\text{H}_2\text{SO}_4$ , followed by the addition of 0.5 g $\text{Na}_2\text{EDTA}$ .         | HLB (500 mg, 6 mL)<br>Pretreatment: methanol (10 mL) Milli-Q water (10 mL). Rinse: Milli-Q water (10 mL). Elution: 10 mL methanol.               | ZORBAX Eclipse Plus C18 (2.1 mm $\times$ 50 mm, 1.8 $\mu\text{m}$ ) and ZORBAX SB C18 (2.1 mm $\times$ 100 mm, 1.8 $\mu\text{m}$ )<br>The mobile phase contained water (A) and acetonitrile (B). | LOD: 0.004~0.6 ng/L;<br>Recovery: 70~120%                       | 16 |
| NA                                                                                                                                                                                                            | HLB (200mg, 6mL)<br>Pretreatment: methanol (5 mL) and ultrapure water (2 mL).<br>Rinse: 12 mL ultrapure water. Elution: 6 mL methanol.           | XTerra MS C18 (2.1 mm $\times$ 100 mm, 3.5 $\mu\text{m}$ )                                                                                                                                       | MDL: 0.01~0.25 ng /L;<br>Recovery: 57.4~138%                    | 17 |
| Water samples were filtered through 0.45 $\mu\text{m}$ fiber filters, and adjusted to pH 5 with citrate buffer. 0.2 g $\text{Na}_2\text{EDTA}$ was added into samples.                                        | Oasis HLB (500 mg, 6mL)<br>Pretreatment: methanol (5 mL) and pure water (5 mL). Rinse: 5 mL deionized sterile water. Elution: 6 mL methanol.     | Intersil ODS-3 (2.1 mm $\times$ 250 mm, 5 $\mu\text{m}$ )<br>The mobile phase contained acetonitrile (A) and purified water with 0.3% formic acid (B).                                           | Recovery: 58~91%<br>RSD: 0.5~2.5%                               | 18 |
| NA                                                                                                                                                                                                            | NA                                                                                                                                               | NA                                                                                                                                                                                               | LOD: 0.01~8 ng/L;<br>LOQ: 0.1~20 ng/L;<br>Recovery: 53.79~138%; | 19 |

|                                                                                                                                                                                                                       |                                                                                                                                                                                   |                                                                                                                                              |                                                                |    |
|-----------------------------------------------------------------------------------------------------------------------------------------------------------------------------------------------------------------------|-----------------------------------------------------------------------------------------------------------------------------------------------------------------------------------|----------------------------------------------------------------------------------------------------------------------------------------------|----------------------------------------------------------------|----|
| Na <sub>2</sub> EDTA was added in to samples and then filtered through 0.7 μm glass fiber.                                                                                                                            | Oasis HLB and Oasis MAX<br>Pretreatment: ultrapure water. Elution: methanol.                                                                                                      | The mobile phase contained methanol (A) and methanol with 1% formic acid (B).                                                                | NA                                                             | 20 |
| Water sample was filtered through 0.45 μm fiber filters and then acidified to pH 2.5 by adding HCl, followed by the addition of 0.2 g Na <sub>2</sub> EDTA.                                                           | Qasis HLB<br>Pretreatment: methanol (5 mL) and ultrapure water (5 mL).<br>Rinse: ultrapure water (5 mL). Elution: methanol (6mL).                                                 | Eclipse Plus C18 (3.0 mm × 100 mm, 1.8 μm).<br>The mobile phase contained 0.1% formic acid (A) and acetonitrile with 0.1% formic acid (B).   | LOD: 0.4~1.9 ng/L<br>Recovery: 64.5%~132%                      | 21 |
| Water samples were acidified to pH 3 with H <sub>2</sub> SO <sub>4</sub> , followed by the addition of 0.5% methanol and 0.5 g Na <sub>2</sub> EDTA. Water samples were filtered through glass fiber filters finally. | HLB (500mg, 6mL)<br>Pretreatment: methanol (20 mL) ultrapure water (6 mL). Rinse: methanol and 10 mL ultrapure water. Elution: 12 mL methanol.                                    | RRHD Zorbax Stable Bond-C18 (2.1 mm × 100mm, 1.8 μm)<br>The mobile phase contained 0.2% formic acid in ultrapure water (A) and methanol (B). | LOD: 0.0015~1.6 ng/L;<br>Recovery: 51~101%                     | 22 |
| Water sample (1 L) was filtered through 0.45 μm fiber filters and acidified to pH 4 with diluted HCl, followed by the addition of 0.5g/L Na <sub>2</sub> EDTA.                                                        | C18<br>Pretreatment: methanol (12 mL) and ultrapure water (12 mL).<br>Rinse: ultrapure water (5 mL). Elution: methanol (6 mL).                                                    | C18 (4.6 mm × 250mm, 5 μm)<br>The mobile phase contained 0.2% formic acid (A) and acetonitrile (B).                                          | Recovery: 91.4~98.6%;<br>RSD: 3.3~9.6%                         | 23 |
| Water sample (400 mL) was filtered through 0.45 μm fiber filters and then acidified to pH 3~4 by adding 3%~5% HCl.                                                                                                    | Oasis HLB<br>Pretreatment: methanol (10 mL) and ultra-pure water (10 mL).<br>Rinse: ultrapure water (5 mL). Elution: methanol (10mL).                                             | BEH C18 (50 mm × 2.1 mm, 1.7 μm).<br>The mobile phase contained methanol with 0.1% formic acid (A) and water (B) .                           | LOD: 2.5~20.36 ng/L                                            | 24 |
| Water sample (500mL) was filtered through 0.45 μm fiber filters and then acidified to pH 4 by adding 1mol/L HCl, followed by the addition of 0.2 g Na <sub>2</sub> EDTA.                                              | Oasis HLB<br>Pretreatment: methanol (6 mL) and ultra-pure water (6 mL).<br>Rinse: ultrapure water (6 mL). Elution: methanol (6mL).                                                | Dionex C18 (2.1 mm × 150 mm, 3 μm)<br>The mobile phase contained methanol (A) and 0.1% formic acid (B).                                      | MQL: 0.3~3.3ng/L;<br>Recovery: 66.2~109.2%;<br>RSD: 4.1%~15.3% | 25 |
| Water sample (1L) was filtered through two fiber filters: one at 0.8 μm and the one at 0.22 μm and then 0.5 g of Na <sub>2</sub> EDTA was added. The pH was adjusted to 4 using 1mol/L HCl                            | Oasis HLB<br>Pretreatment: methanol (5 mL) and ultrapure water (5 mL).<br>Rinse: 10 mL ultrapure water containing 5% methanol. Elution: 10 mL methanol containing 1% formic acid. | BEHC18 ( 2.1 mm × 50 mm, 1.7 um)<br>The mobile phase contained acetonitrile (A) and 0.05% formic acid in ultrapure water (B).                | LOD: 0.01~0.95 ng/L;<br>Recovery: 72.1~104.6%;<br>RSD<10%      | 26 |

|                                                                                                                                                                                                                     |                                                                                                                                                                                                                           |                                                                                                                                          |                                                                  |    |
|---------------------------------------------------------------------------------------------------------------------------------------------------------------------------------------------------------------------|---------------------------------------------------------------------------------------------------------------------------------------------------------------------------------------------------------------------------|------------------------------------------------------------------------------------------------------------------------------------------|------------------------------------------------------------------|----|
| Water samples were acidified to pH 3.                                                                                                                                                                               | HLB (500 mg, 6mL)                                                                                                                                                                                                         | RP18 (150 mm × 2.1 mm, 3.5 μm).<br>The mobile phase contained formic acid (A) and acetonitrile (B).                                      | LOD: 0.003~0.016 ng/L;<br>Recovery:71~105%<br>RSD: 2.7~12.9%     | 27 |
| Water sample (400mL) was filtered through 0.45 μm fiber filters and 2mL of 100g/L Na <sub>2</sub> EDTA was added. The pH was adjusted to 3 with H <sub>3</sub> PO <sub>4</sub> .                                    | HLB (500mg, 6mL)<br>Pretreatment: methanol (6 mL) and ultrapure water (3 mL) and Sodium dihydrogen phosphate solution (6mL). Rinse: ultrapure water (6 mL). Elution: methanol (3 mL) and methanol with 2% ammonia (3 mL). | XBridge C18(150 mm × 2.1 mm, 5 μm)<br>The mobile phase contained acetonitrile (A) and methanol with 1% formic acid (B).                  | LOD:0.05~0.32 ng/L<br>Recovery: 69.5~122.6%<br>RSD: 1.43~9.75%   | 28 |
| Water samples were filtered through 0.45 μm glass fiber filters and then acidified to pH 3 by adding HCl, followed by the addition of 1.2 g Na <sub>2</sub> EDTA.                                                   | Oasis HLB (500 mg, 6 mL)<br>Pretreatment: methanol (5 mL) and ultrapure water (5mL). Rinse: 15 mL ultrapure water. Elution: 10 mL methanol containing 5% ammonium hydroxide.                                              | Agilent Zorbax Eclipse XDB-C18 (4.6 mm × 150 mm, 5 μm)<br>The mobile phase contained acetonitrile (A) and 0.1% formic acid (B).          | LOD: 0.04~1.1 ng/L;<br>LOQ: 0.1~3 ng/L;<br>Recovery: 57.8~133.9% |    |
| Water samples were filtered through 0.45 μm fiber filters and acidified to pH 3 with 0.1 mol/L HCl, followed by the addition of 0.2 g Na <sub>2</sub> EDTA                                                          | Oasis HLB (200 mg, 6mL)<br>Pretreatment: methanol (6 mL) and ultrapure water (6 mL). Rinse: 10 mL ultrapure water. Elution: 6 mL methanol.                                                                                | Xbridge C18 (150 mm × 2.1 mm, 3.5 μm)<br>The mobile phase contained acetonitrile (A) and 0.1 % formic acid (B).                          | LOQ: 0.1~0.5 ng/L;<br>Recovery: 60.4~99.6 %;<br>RSD: 0.1~21.7%   | 29 |
| Water samples were filtered through 0.45 μm glass fiber filters and then 0.4 g Na <sub>2</sub> EDTA was added into water samples. The pH value was adjusted to 3 by adding H <sub>2</sub> SO <sub>4</sub> and NaOH. | HLB (500 mg, 6 mL)<br>Pretreatment: methanol (2 mL) and 0.1% formic acid in ultrapure water (2 mL). Rinse: 2 mL ultrapure water. Elution: 10 mL ultrapure water.                                                          | Atlantis <sup>®</sup> T3 (150 mm × 2.1 mm, 3 μm)<br>The mobile phase contained 0.2% formic acid in ultrapure water (A) and methanol (B). | LOD: 0.18-0.52 ng/L;<br>Recovery: 79.91~91.31%                   | 30 |
| NA                                                                                                                                                                                                                  | NA                                                                                                                                                                                                                        | Agilent Zorbax Eclipse XDB-C18 (4.6 mm × 150 mm, 5 μm)                                                                                   | Recovery:98.7~102.5%                                             | 31 |

NA, Not available

**Table S2** Summary of the aquatic toxicity data and lowest PNEC values of target antibiotics

| Compound     | Taxonomic group |                         | NOEC (mg/L)             | L(E)C <sub>50</sub> (mg/L) | AF   | Lowest PNEC (ng/L) | Reference |   |
|--------------|-----------------|-------------------------|-------------------------|----------------------------|------|--------------------|-----------|---|
| SMZ          | Bacteria        | <i>V. fischeri</i>      |                         | 344.7                      | 1000 |                    | 3         |   |
|              | Algae           | <i>P. subcapitata</i>   | 0.001                   |                            | 100  | 10000              | 3         |   |
|              | Invertebrate    | <i>D. magna</i>         |                         | 158.8                      | 1000 |                    | 3         |   |
|              | Fish            | <i>O. latipes</i>       |                         | >100                       | 1000 |                    | 3         |   |
| SDZ          | Algae           | <i>S. capricornutum</i> |                         | 2.19                       | 1000 |                    | 3         |   |
|              | Algae           | <i>C. vulgaris.</i>     |                         | 1.226                      | 1000 | 1226               | 3         |   |
| SMX          | Algae           |                         |                         | 0.52                       | 1000 |                    | 3         |   |
|              | Algae           | <i>C. vulgaris.</i>     |                         | 1.57                       | 1000 |                    | 3         |   |
|              | Algae           | <i>S. capricornutum</i> | 0.614                   |                            | 100  |                    | 3         |   |
|              | Algae           | <i>P. subcapitata</i>   | <0.0005                 |                            | 100  |                    | 3         |   |
|              | Algae           | <i>S. leopoliensis</i>  |                         | 0.027                      | 1000 | 27                 | 3         |   |
|              | Rotifers        |                         |                         | 9.63                       | 1000 |                    | 3         |   |
|              | Crustaceans     | <i>C. dubia</i>         |                         | 0.21                       | 1000 |                    | 3         |   |
|              | Bacteria        | <i>V. fischeri</i>      |                         | 78.1                       | 1000 |                    | 3         |   |
|              | Invertebrate    | <i>D. magna</i>         |                         | 177.3                      | 1000 |                    | 3         |   |
|              | Fish            | <i>O. latipes</i>       |                         | 562.5                      | 1000 |                    | 3         |   |
|              | Cnidarian       | <i>H. attenuata</i>     | 5                       |                            | 100  |                    | 3         |   |
|              | TMP             | Algae                   | <i>S. capricornutum</i> |                            | 130  | 1000               |           | 3 |
|              |                 | Algae                   | <i>R. salina</i>        |                            | 16   | 1000               | 16000     | 3 |
| Algae        |                 | <i>S. capricornutum</i> | 25.5                    |                            | 100  |                    | 3         |   |
| Algae        |                 | <i>P. subcapitata</i>   |                         | 40                         | 1000 |                    | 3         |   |
| Cnidarian    |                 | <i>H. attenuata</i>     | >100                    |                            | 100  |                    | 3         |   |
| Invertebrate |                 | <i>D. magna</i>         |                         |                            | 1000 |                    | 3         |   |
| NOR          | Fish            | <i>B. Rerio</i>         |                         |                            | 1000 |                    | 3         |   |
|              | Bacteria        | <i>Vibrio fischeri</i>  | 0.01038                 |                            | 100  | 103.8              | 3         |   |
|              | Algal           | <i>S. capricornutum</i> | 4.01                    |                            | 100  |                    | 3         |   |
| OFX          | Algae           | <i>P. subcapitata</i>   |                         | 18                         | 1000 |                    | 3         |   |
|              | Bacteria        | <i>Vibrio fischeri</i>  | 0.00113                 |                            | 100  | 11.3               | 3         |   |
|              | Algae           |                         |                         | 1.44                       | 1000 |                    | 3         |   |
|              | Algae           | <i>S. leopoliensis</i>  |                         | 0.016                      | 1000 |                    | 3         |   |
|              | Algae           | <i>M. aeruginosa</i>    |                         | 0.021                      | 1000 |                    | 3         |   |
|              | Rotifers        |                         |                         | 0.53                       | 1000 |                    | 3         |   |



|                      |              |                            |         |       |      |      |    |
|----------------------|--------------|----------------------------|---------|-------|------|------|----|
|                      | Crustaceans  |                            |         | 3.13  | 1000 |      | 3  |
| CIP                  | Algae        | <i>P. subcapitata</i>      |         | 6.7   | 1000 |      | 3  |
|                      | Algae        | <i>M. aeruginosa</i>       |         | 0.017 | 1000 |      | 3  |
|                      | Algae        | <i>M. aeruginosa</i>       |         | 0.005 | 1000 | 5    | 32 |
|                      | Algae        | <i>Pseudokirchneriella</i> | 0.5     |       | 100  |      | 33 |
| ENR                  | Bacteria     | <i>Vibrio fischeri</i>     | 0.00288 |       | 100  | 28.8 | 3  |
|                      | Algae        | <i>M. aeruginosa</i>       |         | 0.049 | 1000 |      | 3  |
|                      | Invertebrate | <i>D. magna</i>            |         |       | 1000 |      | 3  |
|                      | Fish         | <i>O. mykiss</i>           |         |       | 1000 |      | 3  |
| OTC                  | Algae        |                            |         | 0.17  | 1000 | 170  | 3  |
|                      | Algae        | <i>S. capricornutum</i>    | 0.342   |       | 100  |      | 3  |
|                      | Rotifers     |                            |         | 1.87  | 1000 |      | 3  |
|                      | Crustaceans  | <i>C. dubia</i>            |         | 0.18  | 1000 |      | 3  |
|                      | Cnidarian    | <i>H. attenuata</i>        | 50      |       | 100  |      | 3  |
| TC                   | Algae        | <i>M. aeruginosa</i>       |         | 0.09  | 1000 |      | 3  |
|                      |              | <i>M. aeruginosa</i>       |         | 0.05  | 1000 | 50   | 29 |
|                      | Algae        | <i>S. capricornutum</i>    |         | 2.2   | 1000 |      | 3  |
|                      | Algae        | <i>P. subcapitata</i>      | 0.0005  |       | 100  |      | 3  |
| CTC                  | Algae        | <i>M. aeruginosa</i>       |         | 0.05  | 1000 |      | 3  |
|                      | Algae        | <i>S. capricornutum</i>    |         | 3.1   | 1000 |      | 3  |
|                      | Algae        | <i>P. subcapitata</i>      | 0.0005  |       | 100  | 5    | 3  |
|                      | Invertebrate | <i>D. magna</i>            |         | >400  | 1000 |      | 3  |
| ETM-H <sub>2</sub> O | Algae        | <i>P. subcapitata</i>      |         | 0.020 | 1000 | 20   | 3  |
|                      | Rotifers     |                            |         | 0.94  | 1000 |      | 3  |
|                      | Crustaceans  | <i>C. dubia</i>            |         | 0.22  | 1000 |      | 3  |
| ROX                  | Algae        | <i>P. subcapitata</i>      |         | 0.047 | 1000 | 47   | 3  |
|                      | Algae        | <i>P. subcapitata</i>      | 0.01    |       | 100  |      | 35 |

**Table S3** Sampling sites of studies on target antibiotics in surface waters of seven major rivers in China

| Surface water | Sampling sites | Sampling sites                                                                                                         | Survey period                                    | reference |
|---------------|----------------|------------------------------------------------------------------------------------------------------------------------|--------------------------------------------------|-----------|
| Yangtze River | S1-S2          | Lower Yangtze River (Jiangsu section)                                                                                  | 11/2018                                          | 1         |
|               | S3-S10         | Yangtze River estuary (Datong, Xuliujing and Wusongkou)                                                                | 6                                                | 4         |
|               | S11-S17        | Yangtze Estuary(Xupu, Daxingang, Yinyang, Bailonggang, Luchao, Wusongkou, and Liuhekou)                                | 7/2011,10/2011                                   | 6         |
|               | S18-S19        | Nanjing reach of the Yangtze River                                                                                     | 8/2018                                           | 8         |
|               | S20-S21        | Middle and lower reaches of the Yangtze River                                                                          | 7/2016                                           | 3         |
|               | S22            | Nanjing reach of the Yangtze River                                                                                     | 4/2017                                           | 7         |
| Yellow River  | S23            | Yellow river mainstream and tributaries (Luo River, Yi River, Xinmang River, Qing River, Sishui River and Jindi River) | 7-10/2006                                        | 10        |
|               | S24-S27        | The intertidal zones of the Yellow River Delta                                                                         | 4/2014, 9/2014                                   | 11        |
| Huai River    | S28-S29        | Shangdong reach of the Huai River                                                                                      | 11/2016                                          | 21        |
|               | S30-S31        | Huai River tributary (Weihe River)                                                                                     | June                                             | 20        |
| Songhua River | S32-S33        | Harbin reach of Songhua River                                                                                          | NA                                               | 24        |
|               | S34-S37        | Middle part of the Songhua River; sample sites included 8 mainstreams and 11 tributaries                               | 1/2016,5/2016,7/2016,10/2016                     | 26        |
|               | S38-S49        | Jilin section of Songhua River and Songhua River tributary (Huifa River, Yinma River and Yitong River)                 | 4/2018,7/2018/2018,10/2018,4/2019,7/2019,10/2019 | 25        |
|               | S50            | Harbin reach of Songhua River                                                                                          | March, June, September, December                 | 23        |
| Liao River    | S51-S52        | Liao River Upstream(Dahuofang reservoir, guangyinge reservori) and Liao River downstream (Bohai Sea, Liaodong Bay)     | 26/10/2011-30/10/2011                            | 27        |
|               | S53-S54        | mainstream and tributaries of Liao River(Daliao River , Hun River andTaizi River)                                      |                                                  | 28        |
|               | S55-S56        | Tributary, upstream, in urban sections and downstream in the Liao River Basin                                          | 5/2012                                           | 29        |
|               | S57-S60        | Mainstream and estuary of Liao River                                                                                   | 5/2015,10,2015 october                           | 32        |
|               | S61-S62        | Upper river of the Liao River in Jilin Province(Dongliao River, Tiaozi River, and Zhaosutai River)                     | 7/2015,11/2015                                   | 30        |
|               | S63-S64        | Tributary of Liao River (Shenfu section of Hun River)                                                                  | 2/7/2018                                         | 31        |

|             |         |                                                                                                                                              |                        |    |
|-------------|---------|----------------------------------------------------------------------------------------------------------------------------------------------|------------------------|----|
|             | S65-S68 | Three Pearl River tributaries (Liuxi River, Zhujiang River and Shijing River)                                                                | NA                     | 14 |
| Pearl River | S69-S72 | Guangzhou Section of Pearl River                                                                                                             | 12/2015,4/2016         | 12 |
|             | S73-S74 | Part of Pearl River                                                                                                                          | NA                     | 13 |
|             | S75-S78 | Pearl River Estuary (Shiziyang channel)                                                                                                      | 1/2011, 8/2010         | 15 |
|             | S79-S80 | Pearl River estuary ( rivers and coastal areas of Zhuhai City)                                                                               | NA                     | 16 |
| Hai River   | S81-S82 | Tributary rivers of Hai River (Daqing River, Beiyun River, Miyun Reservoir, Jiyun River, Chaobai River, Zhangwei River and Baiyangdian Lake) | 8/2007-11/2015         | 19 |
|             | S83-S86 | mainstream and tributaries of Hai River Basin                                                                                                | 8/2009,12/2009, 8/2010 | 18 |
|             | S87-S88 | Hai River mainstream and tributaries( Dagu Drainage River, Chentaizi Drainage River, Duliujian River)                                        | 9/2010                 | 17 |

## References

- 1 G. D. Zhang, S. Y. Lu, Y. Q. Wang, X. H. Liu, Y. Liu, J. M. Xu, T. T. Zhang, Z. Wang and Y. Yang, Occurrence of antibiotics and antibiotic resistance genes and their correlations in lower Yangtze River, China, *Environ. Pollut.*, 2020, 257, 113365.
- 2 Z. Y. Wang, Q. W. Chen, J. Y. Zhang, J. W. Dong, H. L. Yan, C. Chen and R. R. Feng, Characterization and source identification of tetracycline antibiotics in the drinking water sources of the lower Yangtze River, *J. Environ. Manage.*, 2019, 244, 13-22.
- 3 L. J. Zhou, J. Li, Y. D. Zhang, L. Y. Kong, M. Jin, X. D. Yang and Q. L. L. Wu, Trends in the occurrence and risk assessment of antibiotics in shallow lakes in the lower-middle reaches of the Yangtze River basin, China, *Ecotoxicol. Environ. Saf.*, 2019, 183, 109511.1-109511.11.
- 4 H. Zhao, Z. Cao, X. Liu, Y. Zhan, J. Zhang, X. Xiao, Y. Yang, J. L. Zhou and J. Xu, Seasonal variation, flux estimation, and source analysis of dissolved emerging organic contaminants in the Yangtze Estuary, China, *Mar. Pollut. Bull.*, 2017, 125, 208-215.
- 5 C. X. Wu, X. L. Huang, J. D. Witter, A. L. Spongberg, K. X. Wang, D. Wang and J. T. Liu, Occurrence of pharmaceuticals and personal care products and associated environmental risks in the central and lower Yangtze river, China, *Ecotoxicol. Environ. Saf.*, 2014, 106, 19-26.
- 6 C. X. Yan, Y. Yang, J. I. Zhou, M. Liu, M. H. Nie, H. Shi and L. J. Gu, Antibiotics in the surface water of the Yangtze Estuary: Occurrence, distribution and risk assessment, *Environ. Pollut.*, 2013, 175, 22-29.
- 7 N. Tang, S. H. Zhang, M. H. Chen, N. H. Song, H. Z. Xu and Q. Zhang, Contamination level and risk assessment of 12 sulfonamides in surface water of Nanjing reach of the Yangtze River, *Environ. Chem.*, 2018, 37, 505-512 (in Chinese).
- 8 M. J. Feng, Q. Zhang, N. H. Song, Y. Q. Bu, Z. B. Yang, Y. H. Liu, R. X. Guo, J. Q. Chen and S.H. Zhang, Occurrence Characteristics and Risk Assessment of Antibiotics in Source Water of the Nanjing Reach of the Yangtze River, *Chin. J. Envir. Sci.*, 2019, 40, 98-105 (in Chinese).
- 9 Y. Jiang, The occurrence and risk assessment of antibiotic and antibiotic resistant genes in a reservoir located at Yangtze River, Shanghai Jiao Tong University, Shanghai, China, 2018 (in Chinese).
- 10 W. H. Xu, G. Zhang, S. C. Zou, Z. H. Ling, G. L. Wang and W. Yan, A preliminary investigation on the occurrence and distribution of antibiotics in the Yellow River and its tributaries, China, *Water Environ. Res.*, 2009, 81, 248-254.
- 11 S. N. Zhao, X. H. Liu, D. M. Cheng, G. N. Liu, B. C. Liang, B. S. Cui and J. H. Bai, Temporal-spatial variation and partitioning prediction of antibiotics in surface water and sediments from the intertidal zones of the Yellow River Delta, China, *Sci. Total Environ.*, 2016, 569-570, 1350-1358.
- 12 Z. H. Zhou, J. L. Zhao, X. D. Wei and M. S. Liu, occurrence and Ecological Risk of Antibiotics in Surface Water of Guangzhou Section of Pearl River, *Ecol. Environ. Sci.*, 2017, 26, 1034-1041 (in Chinese).
- 13 M. S. Liu, Z. H. Zhou, Y. X. Liu, J. L. Zhao and Y. P. Cai, Distribution Characteristics of Antibiotics in Part of Pearl River, *Guangzhou Chem. Ind.*, 2017, 45, 159-162 (in Chinese).
- 14 J. F. Yang, G. G. Ying, J. L. Zhao, R. Tao, H. C. Su and Y. S. Liu, Spatial and seasonal distribution of selected antibiotics in surface waters of the Pearl Rivers, China, *J. Environ. Sci. Health B.*, 2011, 46, 272-280.
- 15 X. M. Liang, B. C. Chen, X. P. Nie, Z. Shi, X. P. Huang and X. Li, The distribution and partitioning of common antibiotics in water and sediment of the Pearl River Estuary, South China, *Chemosphere.*, 2013, 92, 1410-1416.
- 16 S. Li, W. Z. Shi, H. M. Li, N. Xu, R. J. Zhang, X. J. Chen, W. L. Sun, D. H. Wen, S. L. He, J. G. Pan, Z. G. He and Y. Y. Fan, Antibiotics in water and sediments of rivers and coastal area of Zhuhai City, Pearl River estuary, south China, *Sci. Total Environ.*, 2018, 636, 1009-1019.

- 17 L. H. Gao, Y. Shi, W. H. Li, Liu, J and Y. Q. Cai, Occurrence, distribution and bioaccumulation of antibiotics in the Haihe River in China, *J. Environ. Monit.*, 2012, 14, 1248-1255.
- 18 Y. Luo, L. Xu, M. Rysz, Y. Q. Wang, H. Zhang and P. J. J. Alvarez, Occurrence and Transport of Tetracycline, Sulfonamide, Quinolone, and Macrolide Antibiotics in the Haihe River Basin, China, *Environ. Sci. Technol.*, 2011, 45, 1827-1833.
- 19 H. Y. Chen, L. J. Jing, Y. Teng and J. S. Wang, Characterization of antibiotics in a large-scale river system of China: Occurrence pattern, spatiotemporal distribution and environmental risks, *Sci. Total Environ.*, 2018, 618, 409-418.
- 20 D. X. Wang and Q. Q. Wang, Composition and Spatial Distribution Characteristics of Antibiotics in Main Rivers of Shandong Province, *Environ. Sci. Manage.*, 2020, 45, 67-70 (in Chinese).
- 21 H. Zhang, W. J. Guo, C. Zhu, H. L. Li, G. X. Wang, T. X. Yue and B. T. Ding, Composition and Spatial Distribution Characteristics of Antibiotics in Main Rivers of Shandong Province, *Environ. Monit in China.*, 2019, 35, 94-99 (in Chinese).
- 22 H. Y. Liu, Occurrence, deposition trend and risk assessment of typical antibiotics in the aquatic environment of the Anhui section of Huaihe River Basin, Anhui Normal University, Anhui, China, 2020 (in Chinese).
- 23 L. Lang, X. F. Dong and J. B. Di, Determination of 11 Antibiotics in Harbin Section of Songhua River by SPE-HPLC, *China. Water and Wastewater.*, 2018, 34, 114-118 (in Chinese).
- 24 P. P. W, Research on the distribution and removal of antibiotics in different water bodies, Harbin Industry University, Harbin, China, 2016 (in Chinese).
- 25 S. N. He, Distribution, Ecological risk, Flux and Source of Typical Emerging Contaminants in the Jilin Songhua River, Jilin University, Jilin, China, 2019 (in Chinese).
- 26 W. H. Wang, H. Wang, W. F. Zhang, H. Liang and D. W. Gao, Occurrence, distribution, and risk assessment of antibiotics in the Songhua River in China *Environ. Sci. Pollut. Res.*, 2017, 24, 19282-19292.
- 27 Y. W. Qin, L. Zhang, Y. Shi, Y. Q. Ma, X. Chang and Z. C. Liu, Contamination characteristics and ecological risk assessment of typical antibiotics in surface water of the Daliao River, China, *China. Res. Environ. Sci.*, 2015, 28, 000361-368 (in Chinese).
- 28 C. Q. Yang, L. X. Wang, X. H. H and J. P. Chen, Analysis of pollution levels of 16 antibiotics in the river water of Daliao River water system, *Chin. J. Chrom.*, 2012, 30, 756-762 (in Chinese).
- 29 Y. Bai, W. Meng, J. Xu, Y. Zhang and C. Guo, Occurrence, distribution and bioaccumulation of antibiotics in the Liao River Basin in China, *Environ. Sci.: Processes. impacts.*, 2014, 16, 586-593.
- 30 D. Dong, L. Zhang, S. Liu, Z. Guo and H. Y. X, Antibiotics in water and sediments from Liao River in Jilin Province, China: occurrence, distribution, and risk assessment, *Environ. Earth Sci.*, 2016, 75, 1202.
- 31 Z. S. Lu, Distribution characteristics and risk assessment of typical antibiotics in Shenfu section Hunhe River, Shenyang Normal University, Shenyang, China, 2020 (in Chinese).
- 32 Y. Xu, C. Guo, J. P. Lv, S. Hou, Y. Luo, Y. Zhang and J. Xu, Spatiotemporal profile of tetracycline and sulfonamide and their resistance on a catchment scale, *Environ. Pollut.*, 2018, 241, 1098-1105.
- 33 B. Kolar, L. Arnus, B. Jeretin, A. Gutmaier, D. grobne and M. K. Durjaa, The toxic effect of oxytetracycline and trimethoprim in the aquatic environment, *Chemosphere.*, 2014, 115, 75-80.
- 34 Y. Hu, X. Yan, Y. Shen, M. X. Di and J. Wang, Antibiotics in surface water and sediments from Hanjiang River, Central China: Occurrence, behavior and risk assessment, *Ecotoxicol. Environ. Saf.*, 2018, 157,150-158.
- 35 L. H. Yang, G. G. Ying, H.C. Su, J. L. Stauber, M.S. Adams and M. T. Binet, Growth-inhibiting effects of 12 antibacterial agents and their mixtures on the freshwater microalga *Pseudokirchneriella subcapitata*, *Ecotoxicol. Environ. Saf.*, 2010, 27,1201-1208.
